# Supplementary material for: Nicotinamide-Expanded Allogeneic Natural Killer Cells with CD38 Deletion, Expressing an Enhanced CD38 Chimeric Antigen Receptor, Target Multiple Myeloma Cells
Source: MDPI journal article supplement (doi:10.3390/ijms242417231), 2023-12-07
Supplement: s1 [file s1]

Supplementary Figures

Figure S1

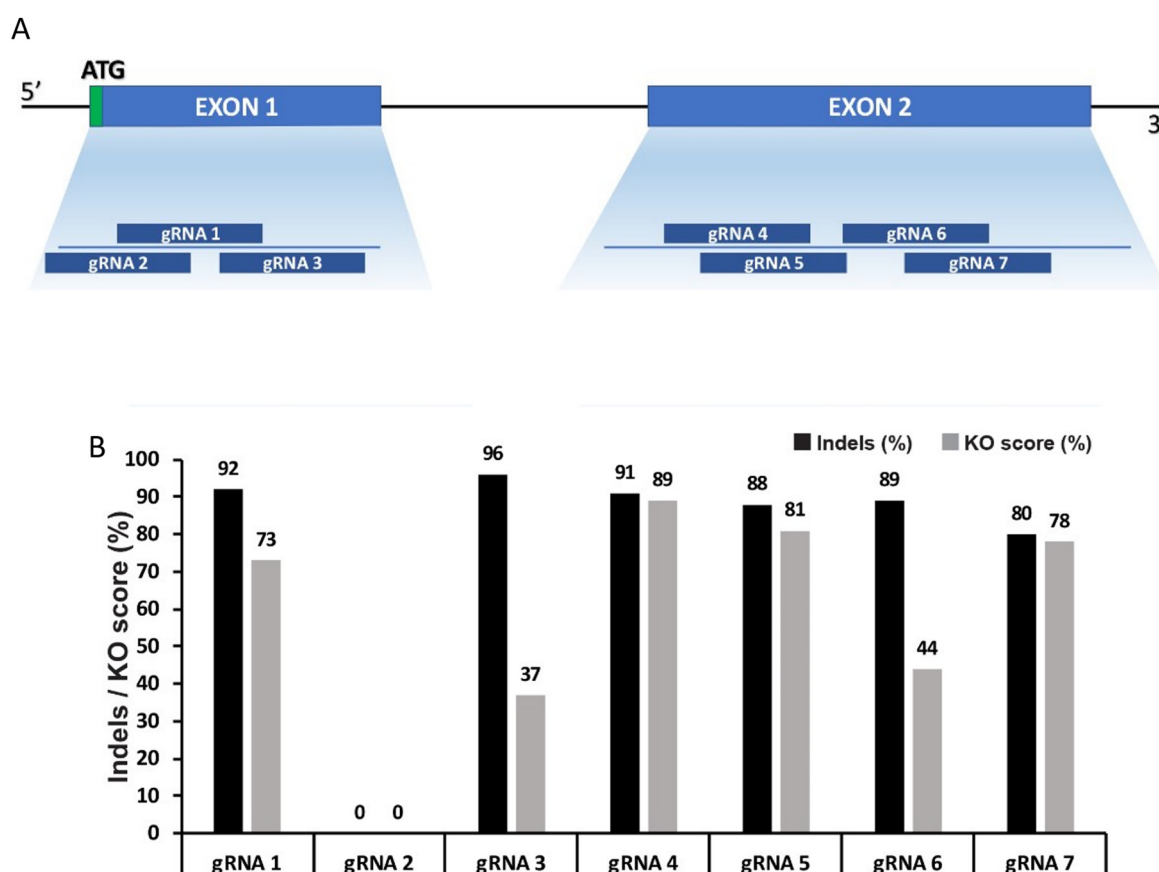

**Figure S1: Experimental analysis of mutagenic NHEJ at the CD38 locus.** (A) Schematic presentation of CD38 gRNAs-targets. (B) Frequency of indel mutations (black) and knock-out score (grey) in the CD38 locus determined by ICE analysis after delivery of CRISPR-Cas9 composed of 7 different gRNAs into HEK293 cells with stable expression of Cas9.

Figure S2

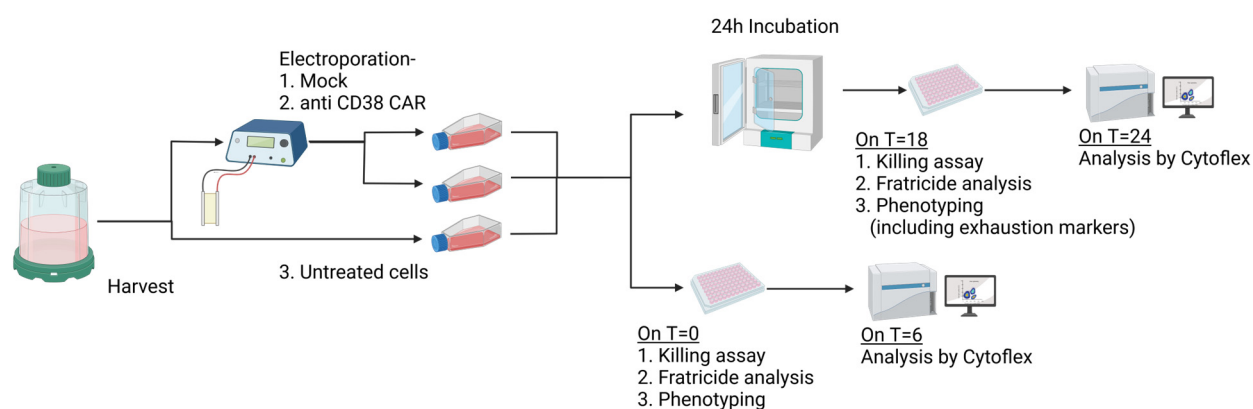

**Figure S2: CD38 knock-out CAR NK cells evaluation, experimental design scheme.** NK cells were cultured for two weeks in standard conditions in the presence of NAM and harvested. Cells were then either electroporated with anti-CD38 CAR mRNA, mock-electroporated, or left untreated. Cell groups were plated in 3 different flasks and incubated in a 37°C incubator for 24 hours. During incubation, cells were sampled five times and stained for viability. Lysis level in untreated cells was regarded as a control for spontaneous background lysis levels. In parallel, NK cells from each flask were sampled immediately after electroporation and 18hrs post-electroporation. Cells were subsequently cocultured with K562 (cd38-) and RPMI8266 (cd38+) for six hours in the presence or absence of Daratumumab.

Figure S3

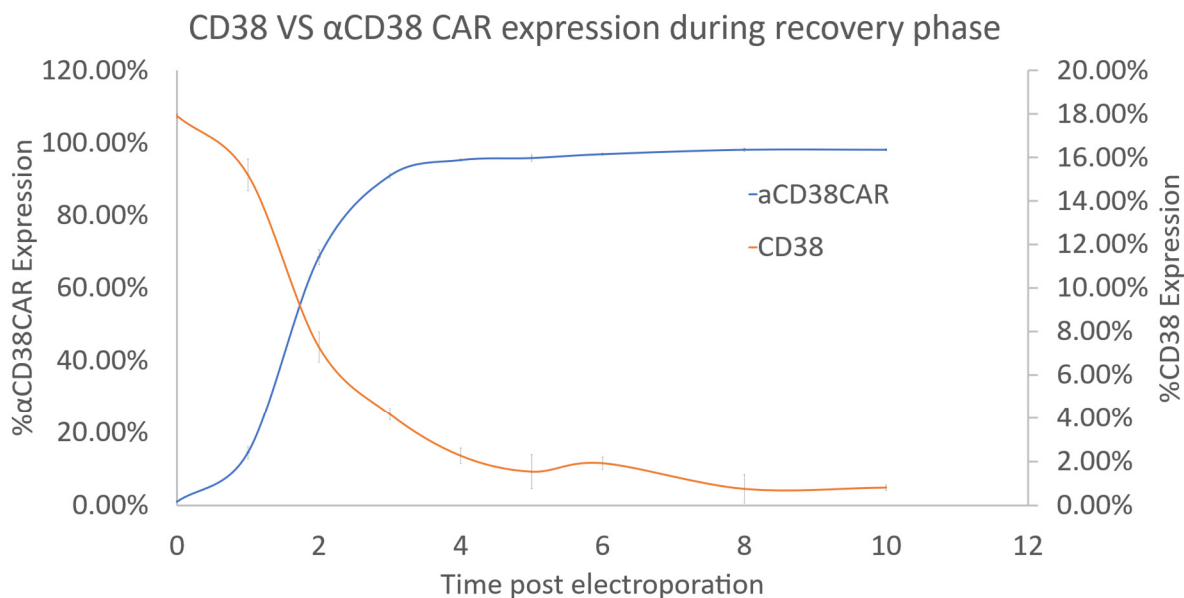

**Figure S3: Longitudinal phenotype analysis of CD38 versus anti-CD38 CAR expression.** On the day of harvest, 6 hours after electroporation, CD38 knock-out CAR cells were stained with FITC conjugated anti-CD56 mAb and an APC conjugated anti-CD38 mAb or incubated with His-tagged conjugated CD38 to induce complex formation with  $\alpha$ CD38 CAR, followed by staining with FITC conjugated  $\alpha$ His tag mAb. Staining was followed by the addition of the Helix viability dye immediately prior to analysis by flow cytometry.

Figure S4

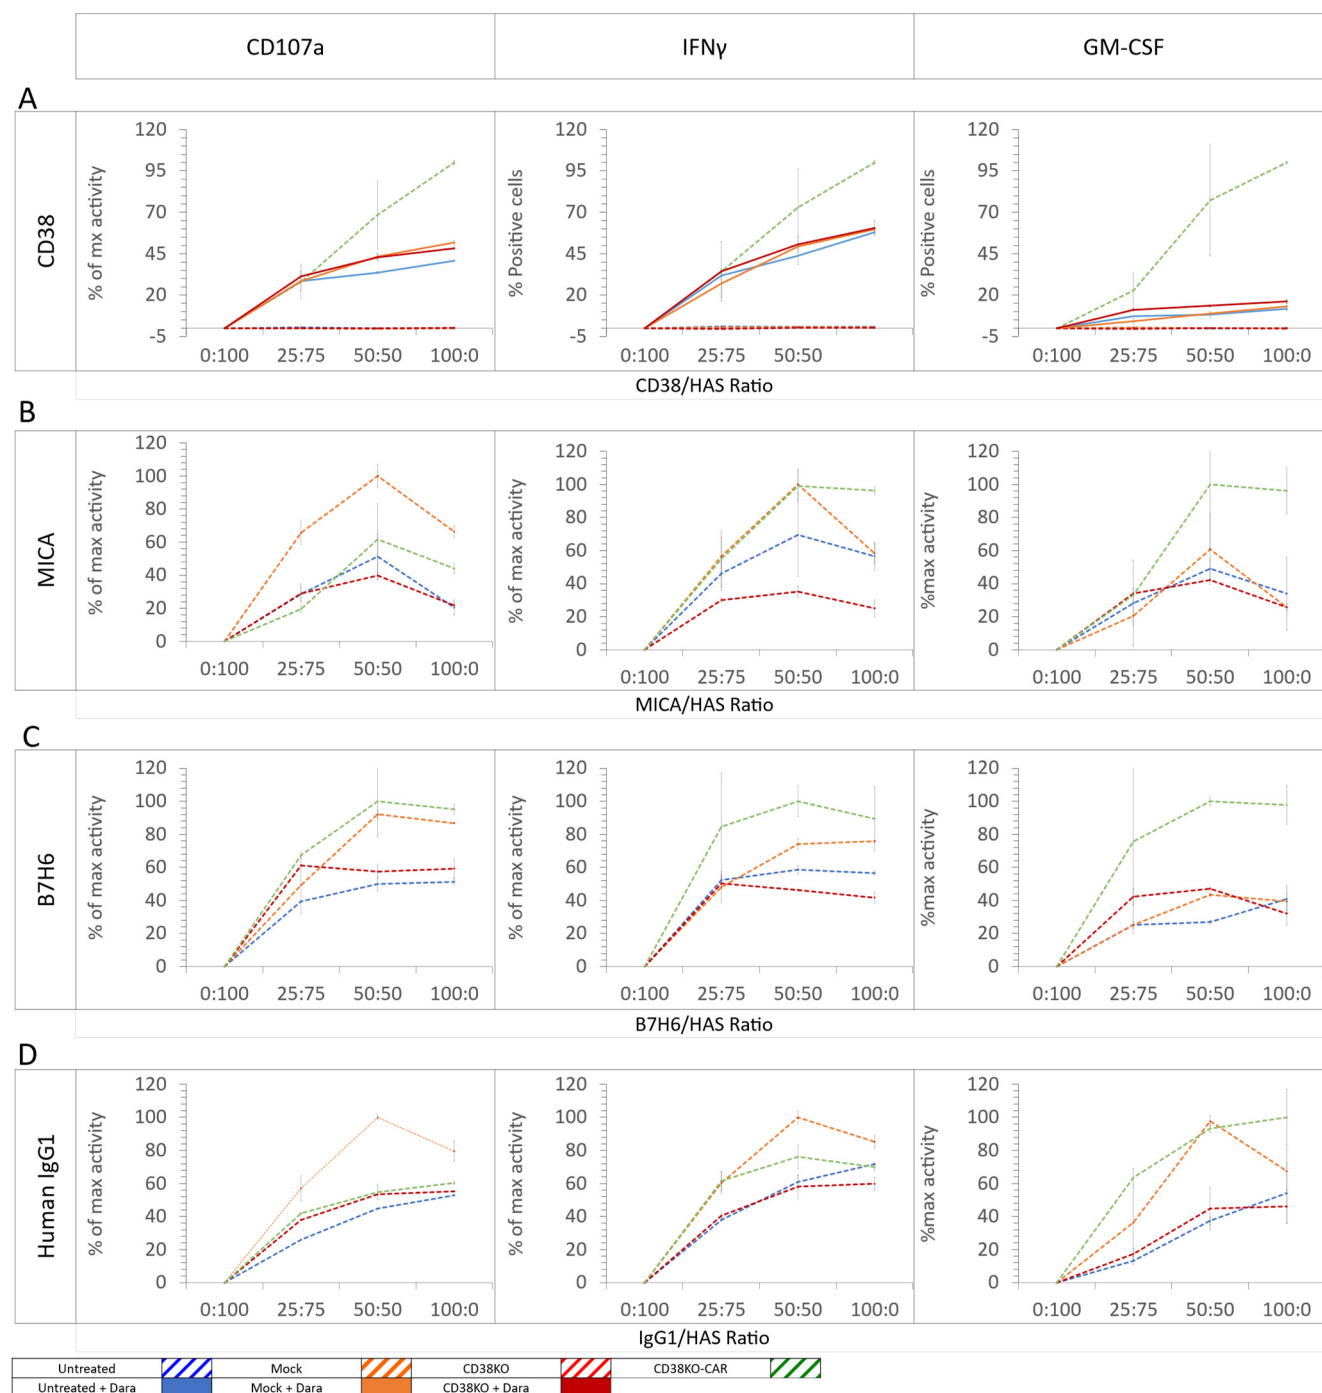

**Figure S4: Single axis activation assay.** Tissue culture plates were pre-coated with gradually increasing concentrations of **(A)** CD38 **(B)** MICA **(C)** B7H6 or **(D)** Human IgG1. CD38-coated plates were either treated with Daratumumab to induce mAb-Ag complex or left untreated. Thawed, untreated, mock electroporated, CD38 knock-out and CD38 knock-out CAR NK cells were plated on the pre-coated plates and incubated for six hours. Cells were harvested and stained for CD107a, IFN $\gamma$ , TNF $\alpha$ , and GM-CSF and analyzed by flow cytometry. Dead cells were excluded by Zombie violet viability dye. Results shown are from 1 representative experiment of 2 performed.

Figure S5

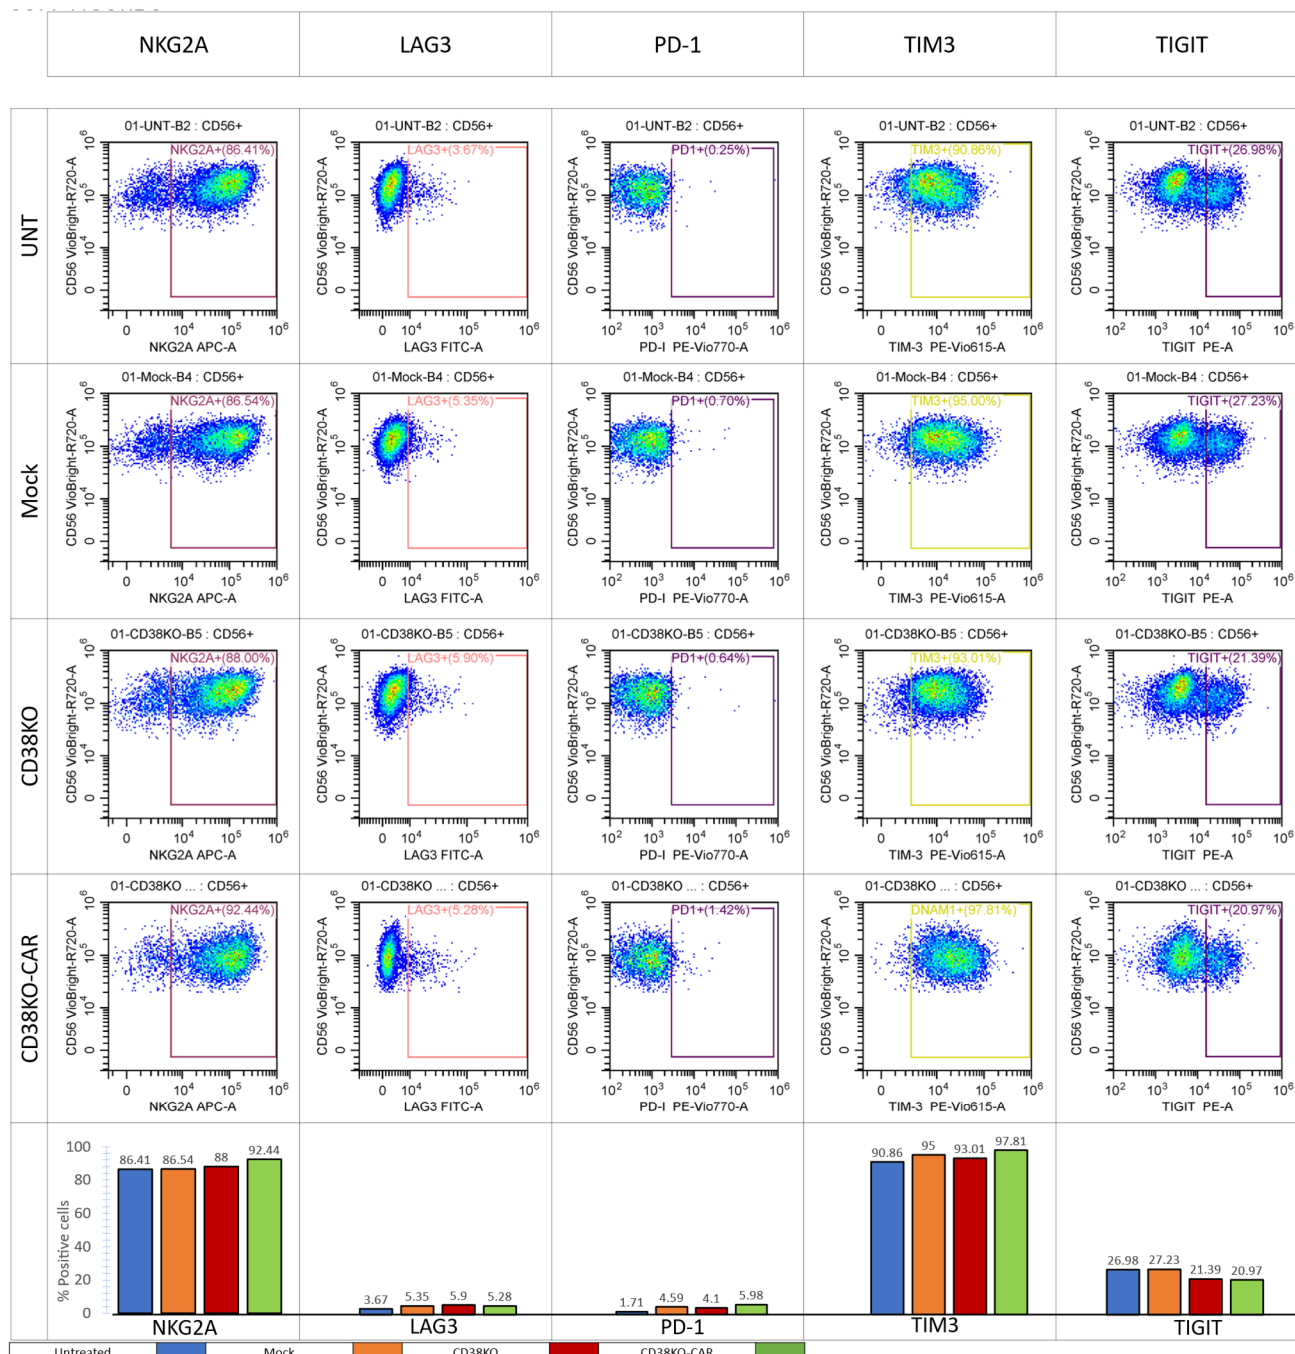

**Figure S5: Inhibition marker expression phenotyping.** On the day of harvest, 6 hours after electroporation, all effector cells were stained with a mix of fluorophore-conjugated mAbs directed to stain a panel of selected NK expressed Inhibition markers, including APC conjugated  $\alpha$ NKG2A mAb, FITC conjugated  $\alpha$ LAG3 mAb, PE-Vio770 conjugated  $\alpha$ PD1 mAb, PE-Vio615 conjugated  $\alpha$ TIM3 mAb, and PE-conjugated  $\alpha$ TIGIT mAb. Stainings were followed by the addition of the Helix viability dye immediately prior to analysis by flow cytometry.

Table S1

|                      | Specificity                 | Fluorochrome    | Vendor        | Cat#        |
|----------------------|-----------------------------|-----------------|---------------|-------------|
| Basic NK phenotyping | CD56                        | FITC            | Miltenyi      | 130-114-549 |
|                      | CD16                        | PE              | Miltenyi      | 130-113-393 |
|                      | CD3                         | APC             | Miltenyi      | 130-113-135 |
|                      | CD19                        | BV421 / VioBlue | Miltenyi      | 130-098-598 |
| GDA-601 phnotyping   | Anti his                    | FITC            | abcam         | Ab 1206     |
|                      | CD38                        | APC             | Miltenyi      | 130-113-429 |
|                      | CD56                        | PE Vio 615      | Miltenyi      | 130-114-550 |
| Potency assay        | Zombie Violet Viability Dye | B.V 421         | Bio Legend    | 4253        |
|                      | CD107a                      | VioGreen        | Miltenyi      | 130-111-629 |
|                      | CD56                        | PE-Vio615       | Miltenyi      | 130-114-549 |
|                      | TNF-a                       | PE-Vio770       | Miltenyi      | 130-118-974 |
|                      | INF-g                       | VioR720         | Miltenyi      | 130-113-499 |
|                      | GM-CSF                      | APC             | Miltenyi      | 130-123-420 |
| Killing assay        | Viability                   | Helix NP Blue   | Bio Legend    | 425305      |
|                      | CellTrace CFSE              | CFSE            | Thermo Fisher | 2266584     |
| exhaustion markers   | TIM-3                       | PE              | Miltenyi      |             |
|                      | LAG-3                       | PE-Vio615       | Miltenyi      |             |
|                      | CD57                        | APC             | Miltenyi      |             |
|                      | PD-1                        | PE-VIO 770      | Miltenyi      | 130-120-385 |
